# Supplementary material for: Anin situsolidifying strategy enabling high-voltage all-solid-state Li-metal batteries operating at room temperature
Source: Royal Society of Chemistry journal article supplement (doi:10.1039/d0ta08590a), 2020-01-01
Supplement: d0ta08590a1.pdf [file d0ta08590a1.pdf]

## Supporting information

### **An In-situ Solidifying Strategy Enabling High-voltage All-Solid-State**

### **Li-metal Batteries Operating at Room Temperature**

Zhu Cheng,<sup>a</sup> Hui Pan,<sup>a</sup> Chao Li,<sup>a</sup> Xiaowei Mu,<sup>a</sup> Yueming Du,<sup>a</sup> Fan Zhang,<sup>a</sup> Xueping Zhang,<sup>a</sup> Ping He\*<sup>a</sup> and Haoshen Zhou\*<sup>b</sup>

<sup>a</sup> Center of Energy Storage Materials & Technology, College of Engineering and Applied Sciences, National Laboratory of Solid State Microstructures, Collaborative Innovation Center of Advanced Microstructures, Nanjing University.

E-mail: pinghe@nju.edu.cn; hszhou@nju.edu.cn;

<sup>b</sup> National Institute of Advanced Industrial Science and Technology (AIST), Umezono 1-1-1, Tsukuba, 305-8568, Japan. E-mail: hszhou@aist.go.jp

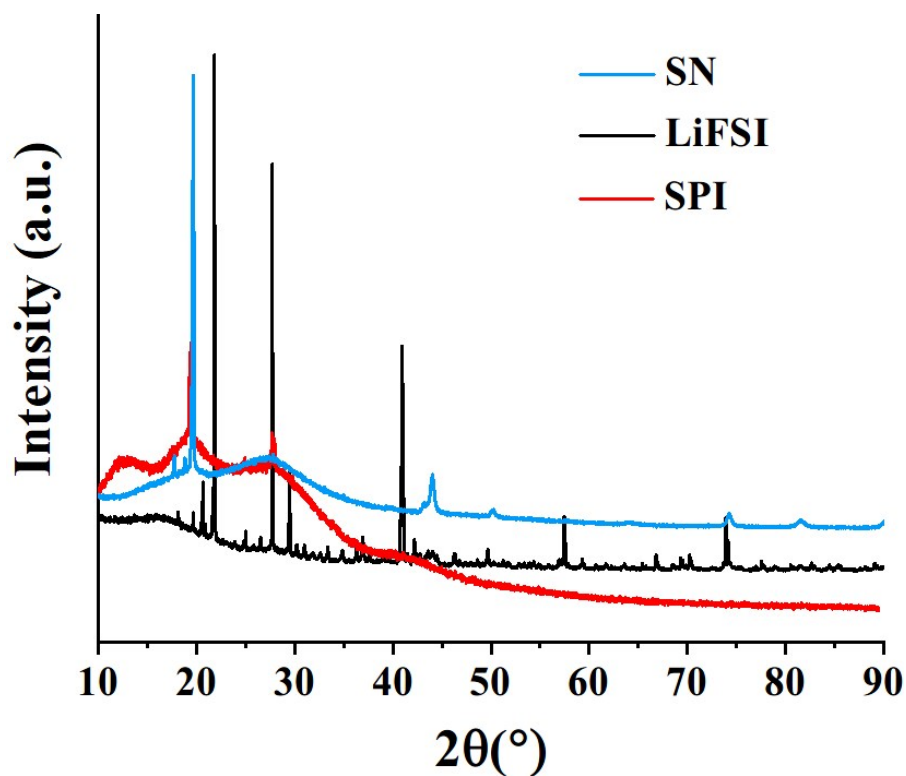

Figure S1. XRD pattern of SN, LiFSI and SPI.

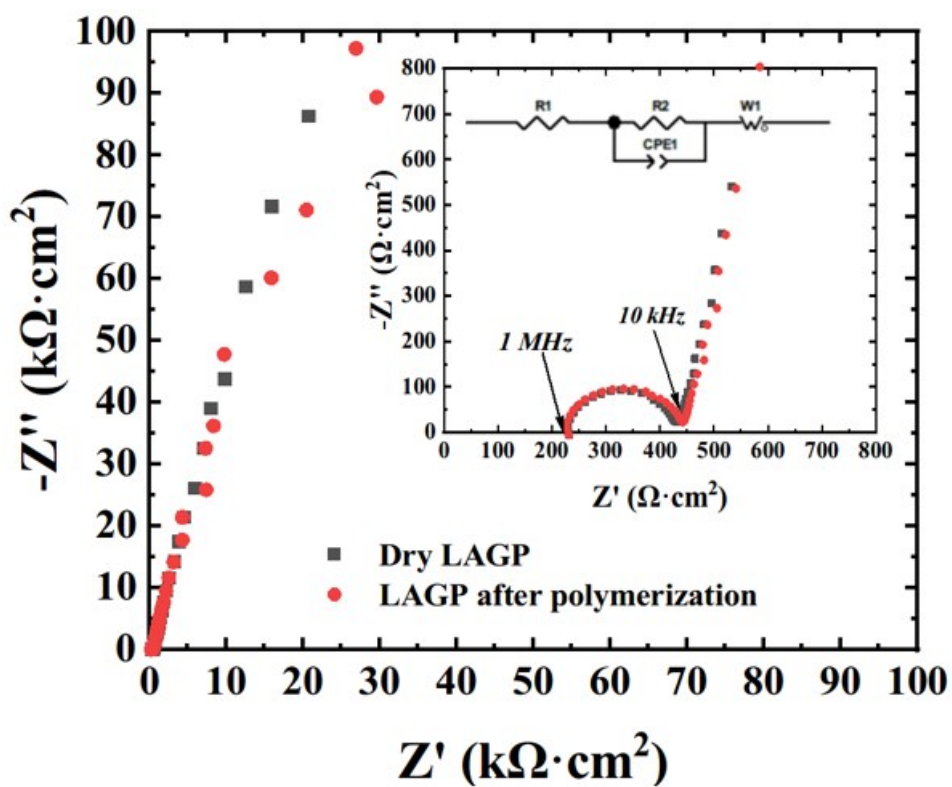

Figure S2. EIS result of LAGP with Au blocking electrodes. The frequency range is from 0.1 Hz to 1 MHz. The LAGP is  $\sim 600$   $\mu\text{m}$  thick and its diameter is  $\sim 16$  mm.

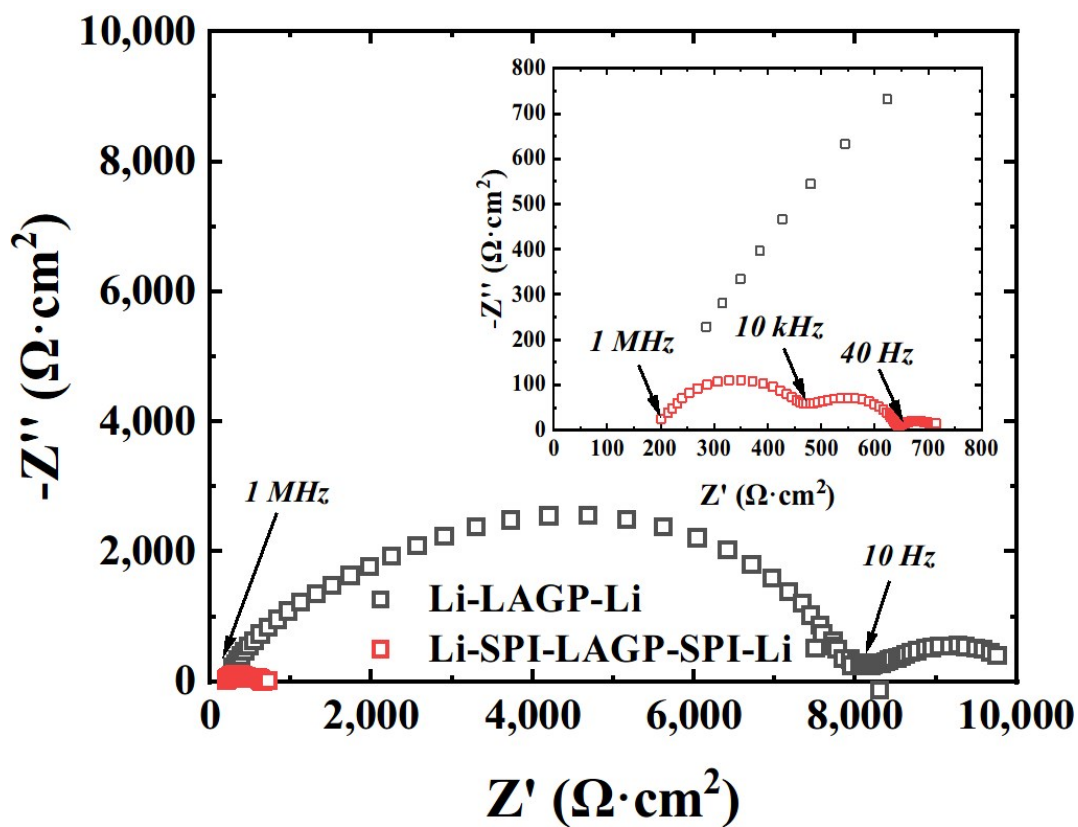

Figure S3. EIS result of the Li-LAGP-Li and Li-SPI-LAGP-SPI-Li symmetric cell.

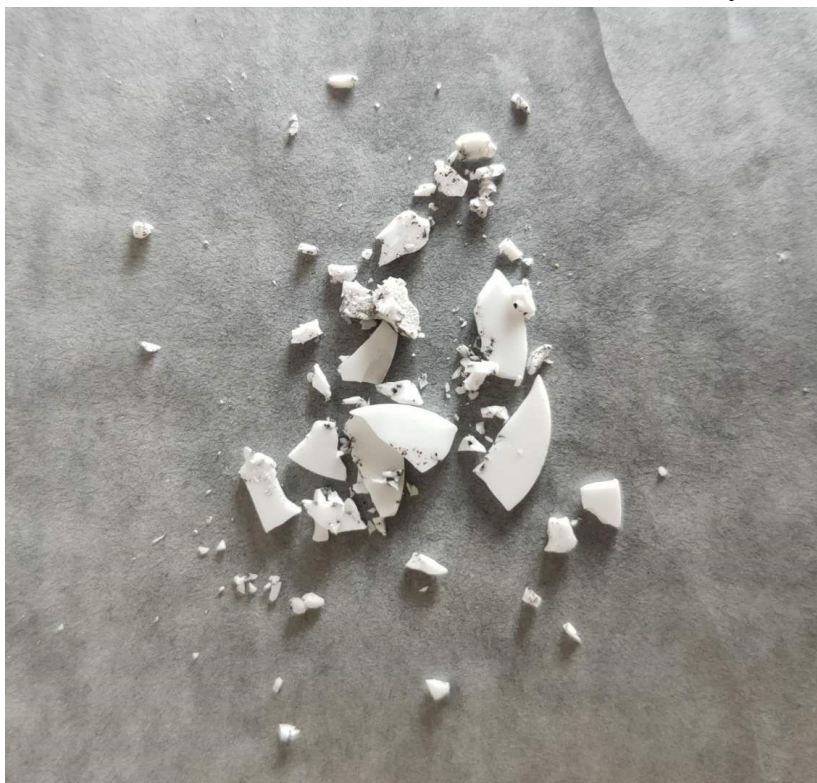

Figure S4. The optical image of the LAGP pellet after cycling in Li-LAGP-Li cell.

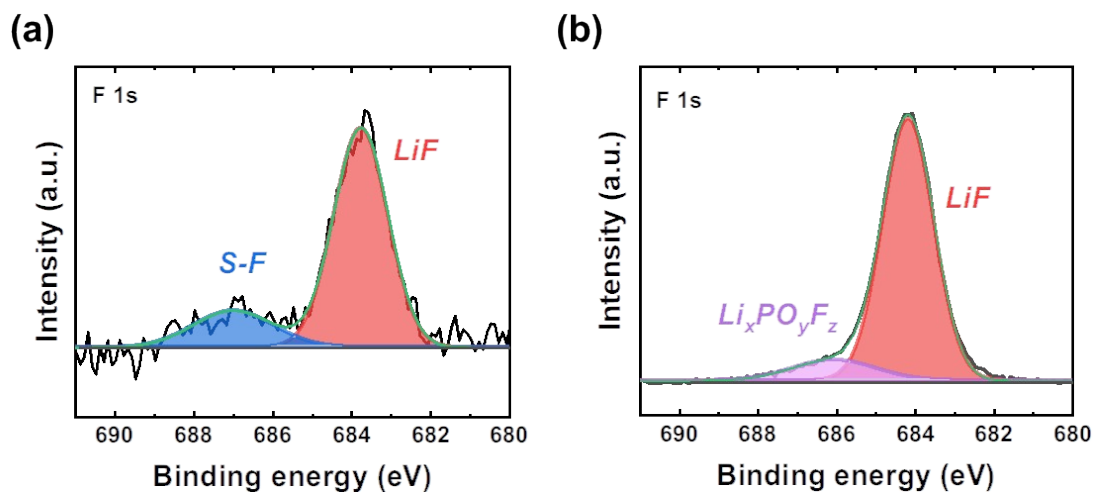

**Figure S5.** F 1s XPS results of the SEI in (a) Li-SPI-LAGP-SPI-Li cell and (b) Li-LE-LAGP-LE-Li cell.

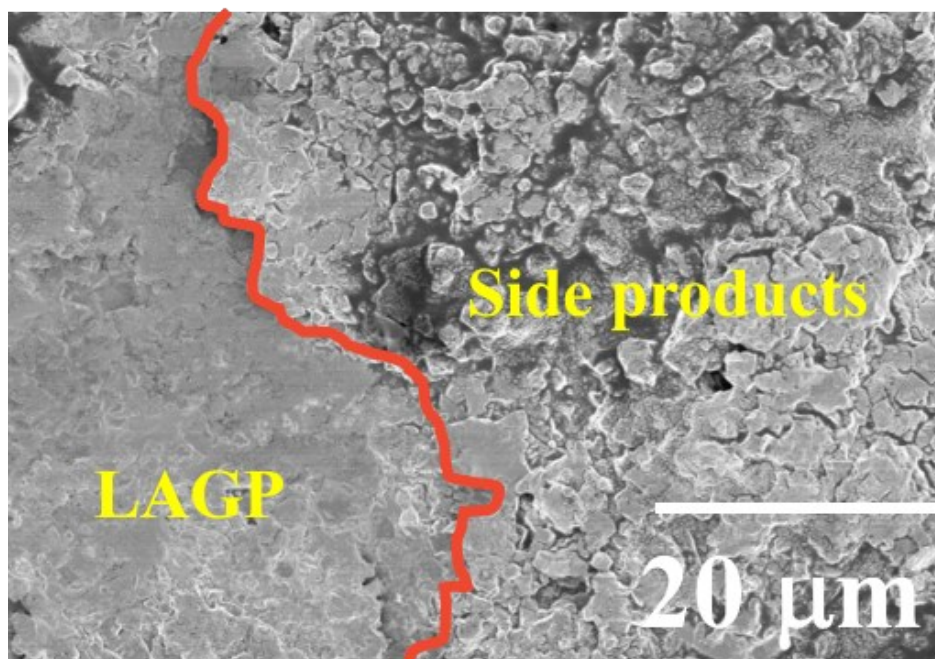

**Figure S6.** SEM image of the surface of LAGP pellet after cycling in Li-LE-LAGP-LE-Li symmetric cell.

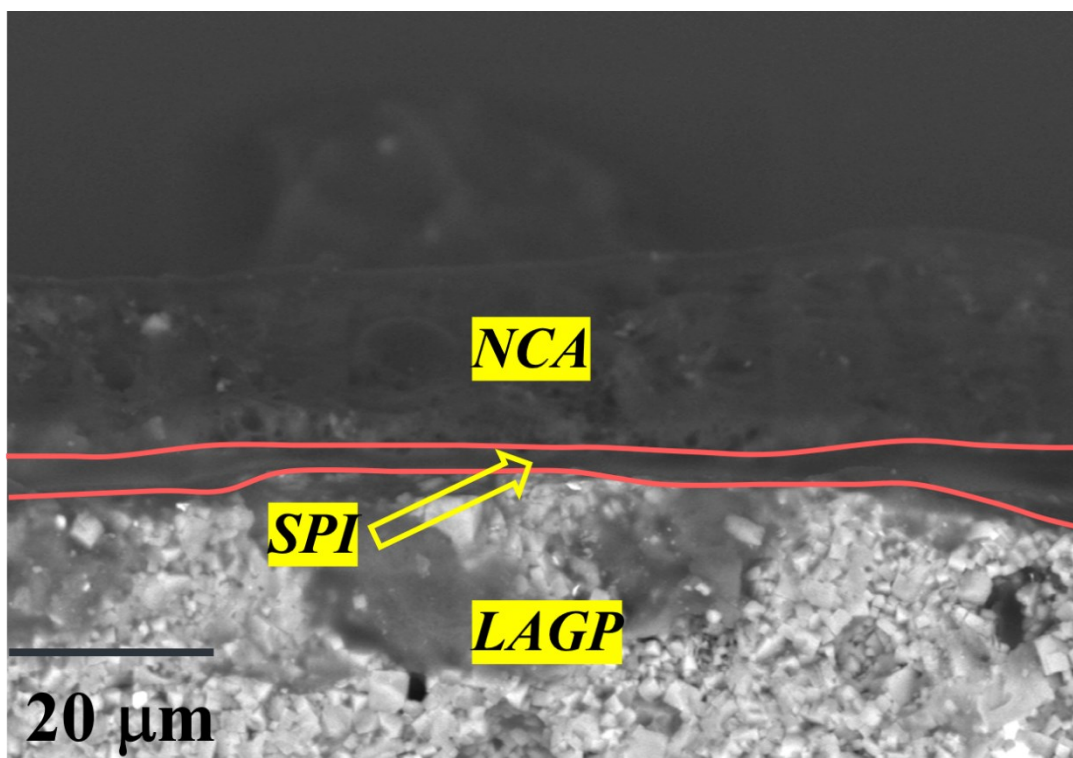

Figure S7. SEM image of the LAGP-NCA interface with SPI modification.

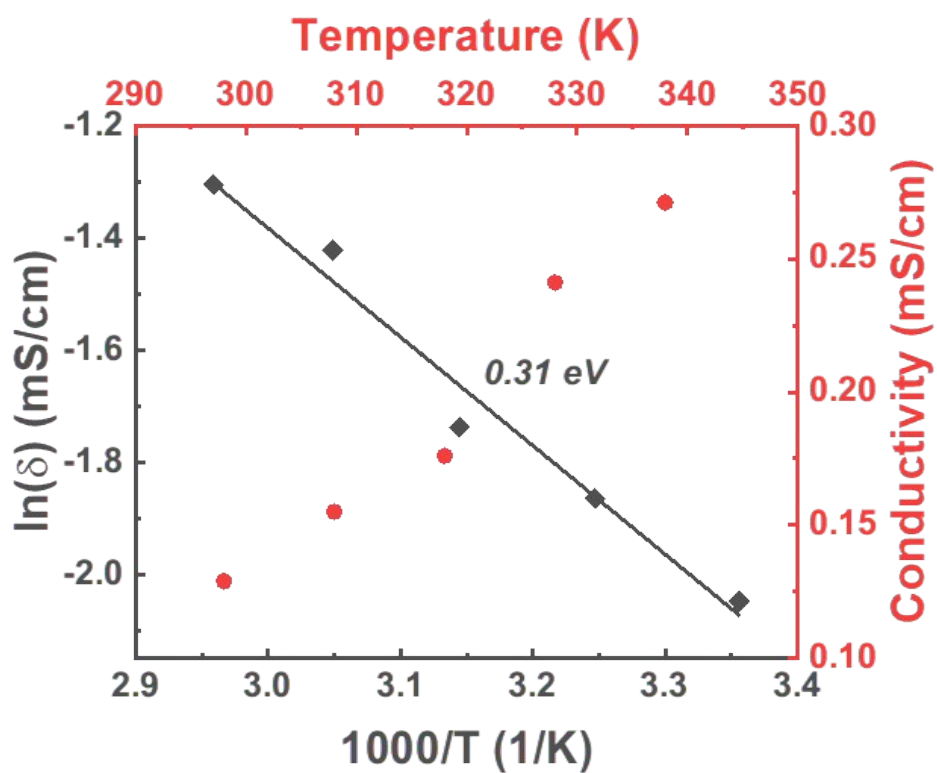

Figure S8. Temperature-dependent ionic conductivity of the LiTFSI-LiBOB based SPI

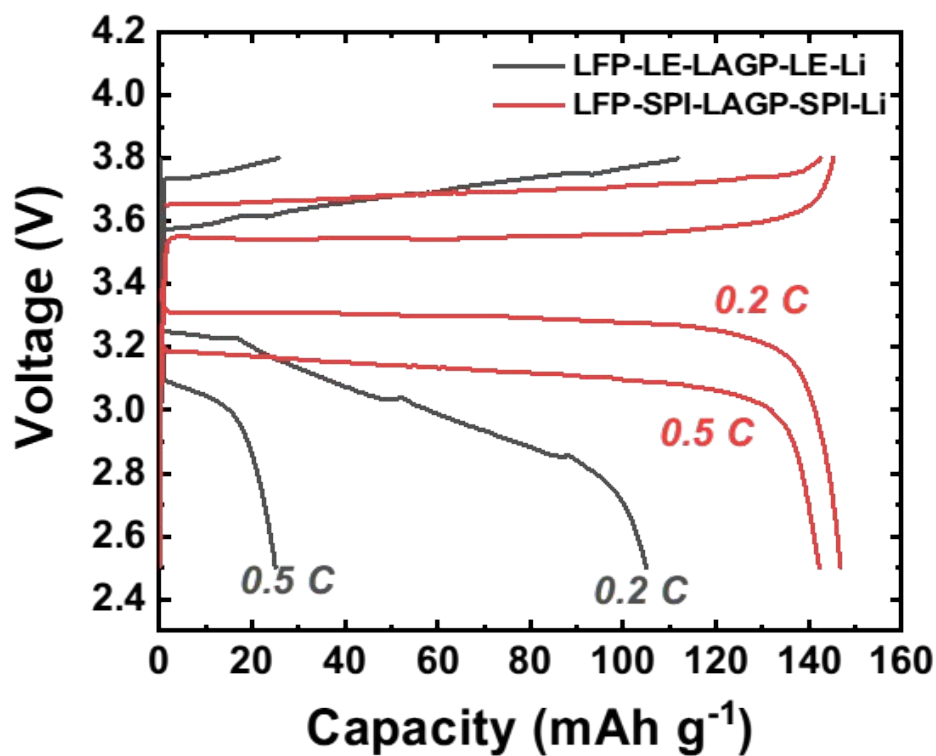

**Figure S9.** Voltage profile of the LFP-LE-LAGP-LE-Li and LFP-SPI-LAGP-SPI-Li cells at 0.2 C and 0.5 C.

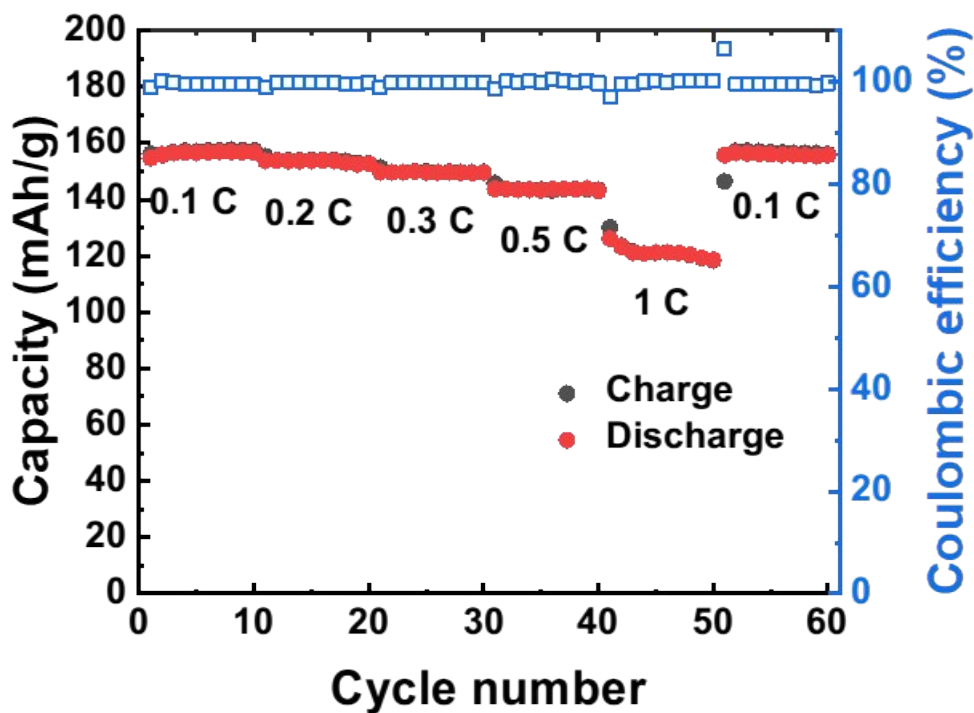

**Figure 10.** Rate performance of the LFP-SPI-LAGP-SPI-Li cell in the voltage range from 2.5 V to 3.8 V.

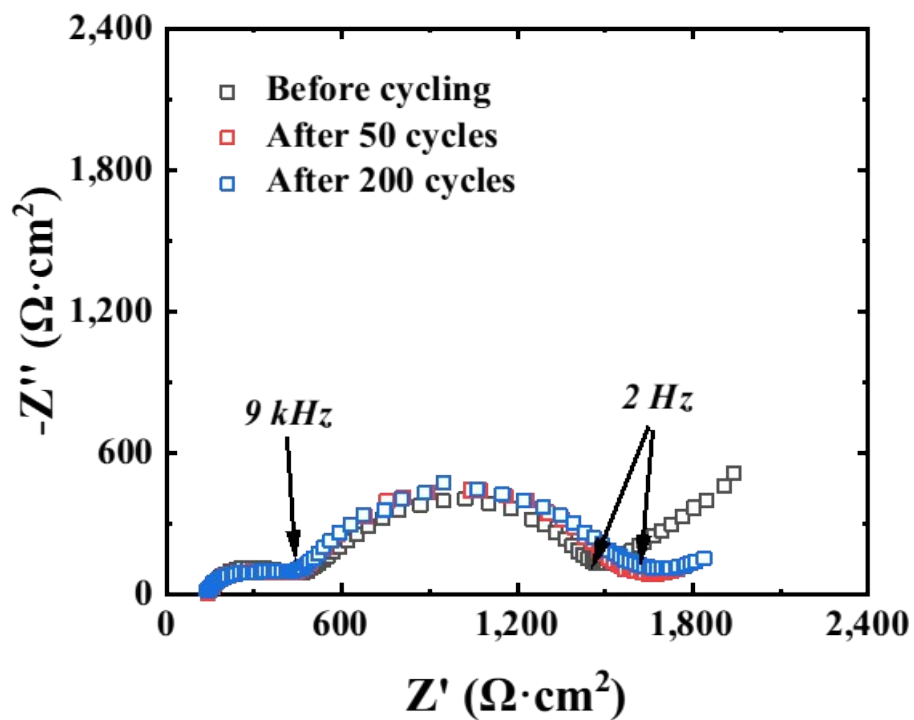

Figure S11. EIS result of the LFP-SPI-LAGP-SPI-Li cell before and after cycling.

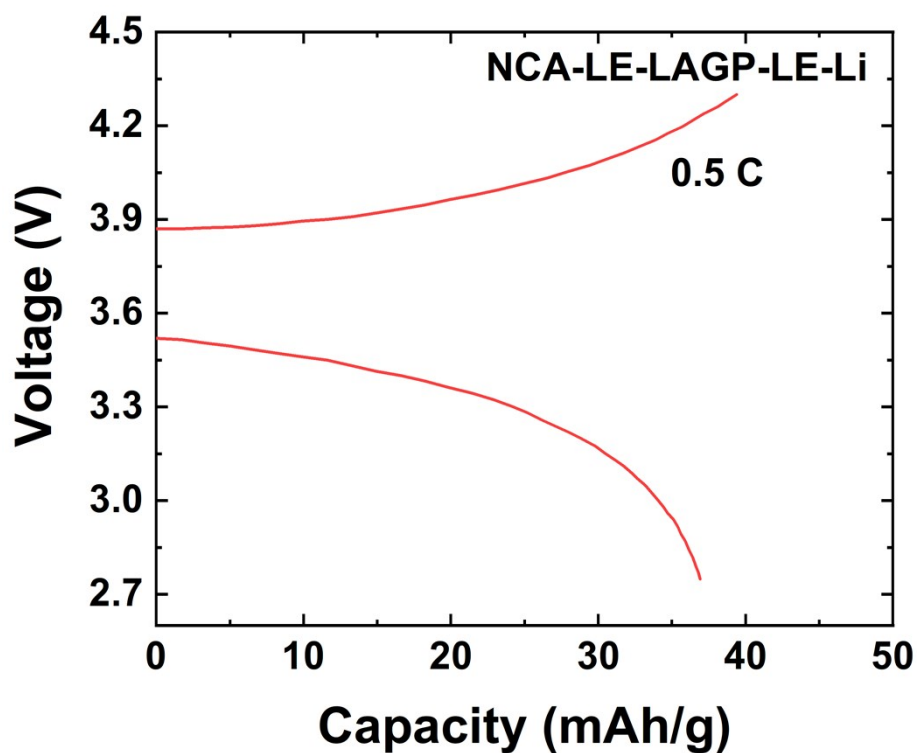

Figure S12. Voltage profile of NCA-LE-LAGP-LE-Li cell at 0.5 C.

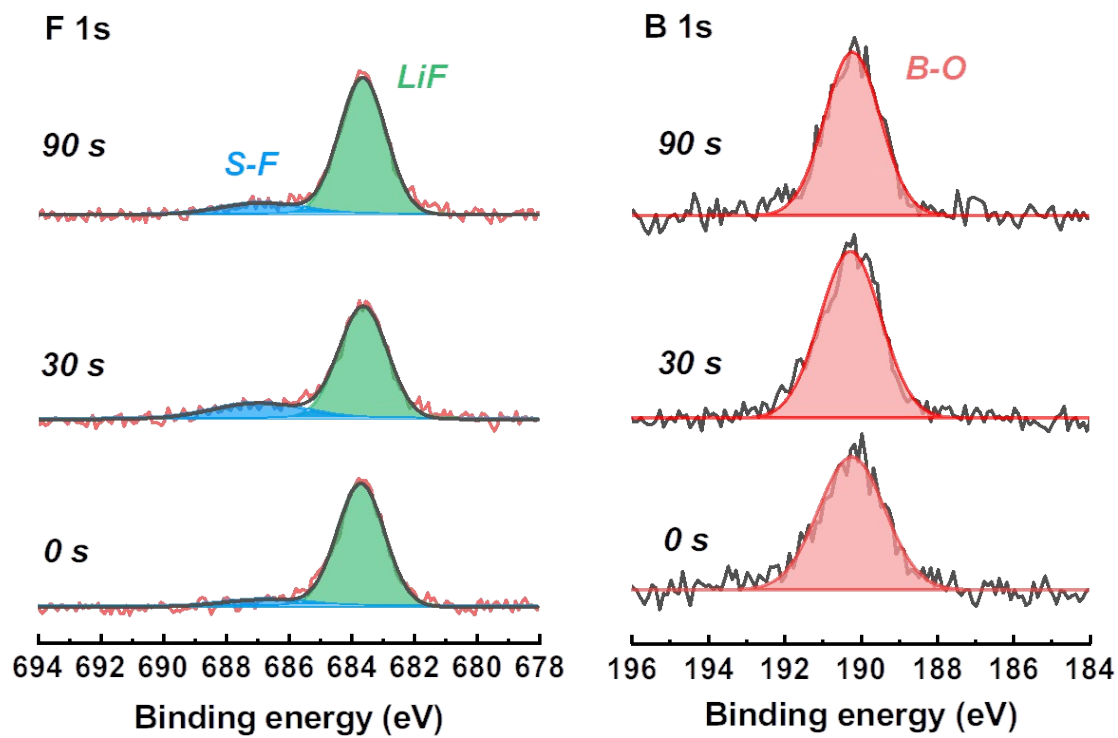

Figure S13. F 1s and B 1s XPS result of the CEI on cycled NCA cathode.

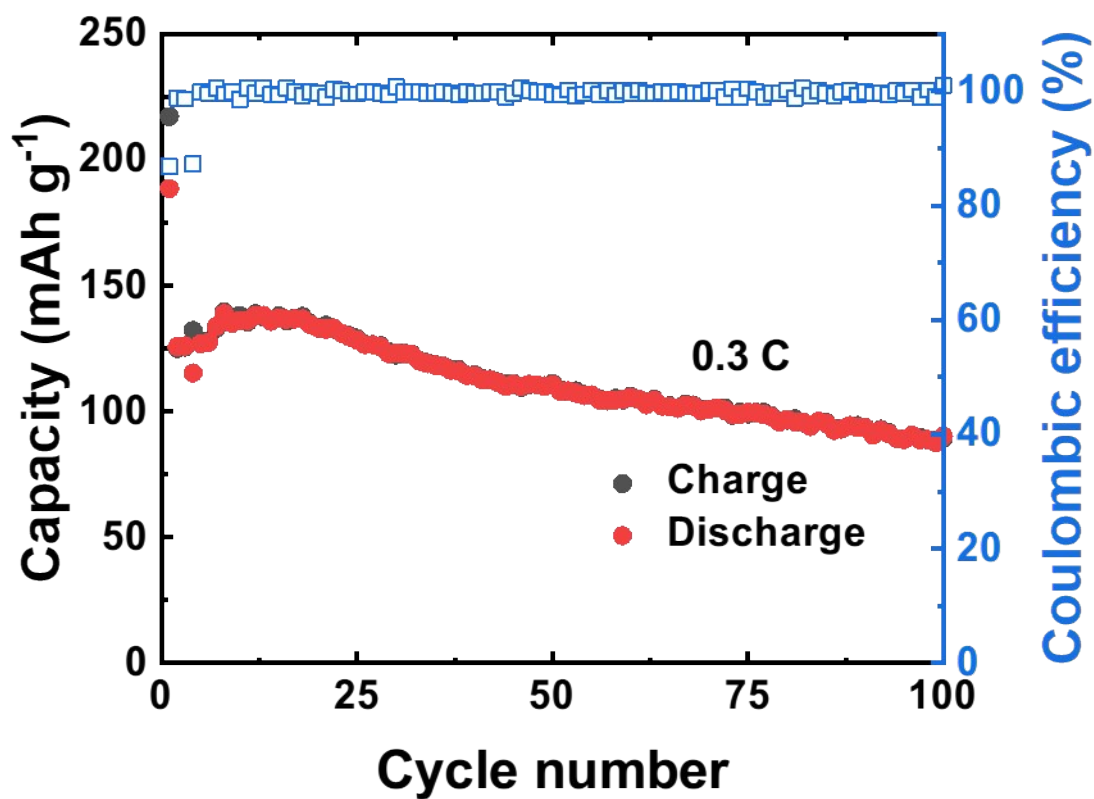

Figure S14. Cycling stability with Coulombic efficiency under 0.3 C for NCA-SPI-LAGP-SPI-Li cell in the voltage range from 2.75 V to 4.3 V.



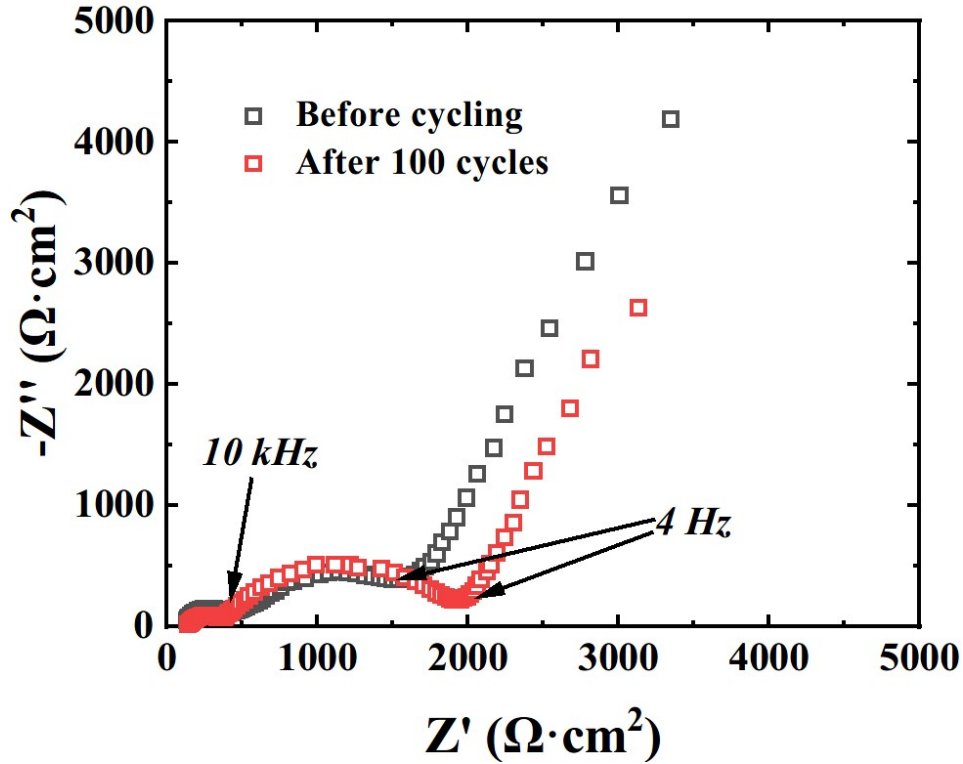

Figure S15. EIS result of the NCA-SPI-LAGP-NCA-Li cell before and after cycling.

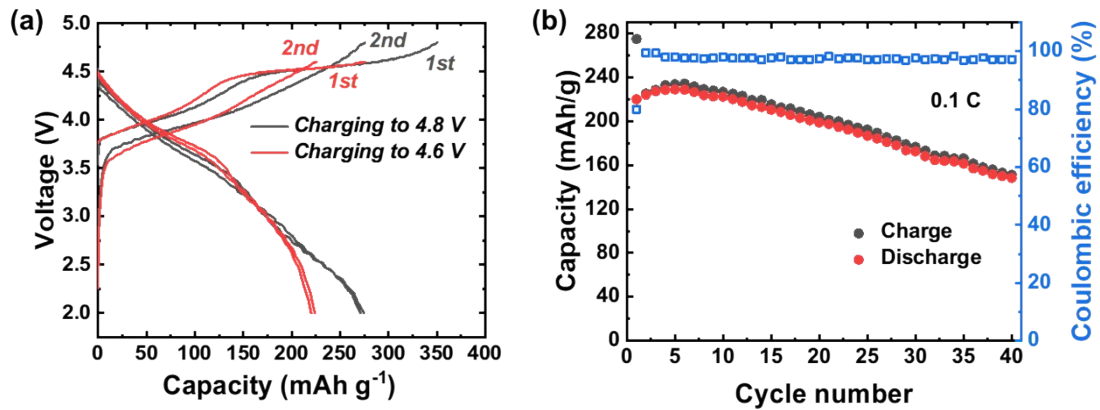

Figure S16. (a) Voltage profile of  $\text{Li}_{1.2}\text{Ni}_{0.13}\text{Co}_{0.13}\text{Mn}_{0.54}\text{O}_2$ -SPI-LAGP-SPI-Li cell for the first two cycles at 0.1 C in the voltage range from 2 V to 4.6 V and from 2 V to 4.8 V. (b) Cycling stability with Coulombic efficiency under 0.1 C for  $\text{Li}_{1.2}\text{Ni}_{0.13}\text{Co}_{0.13}\text{Mn}_{0.54}\text{O}_2$ -SPI-LAGP-SPI-Li cell in the voltage range from 2 V to 4.6 V.

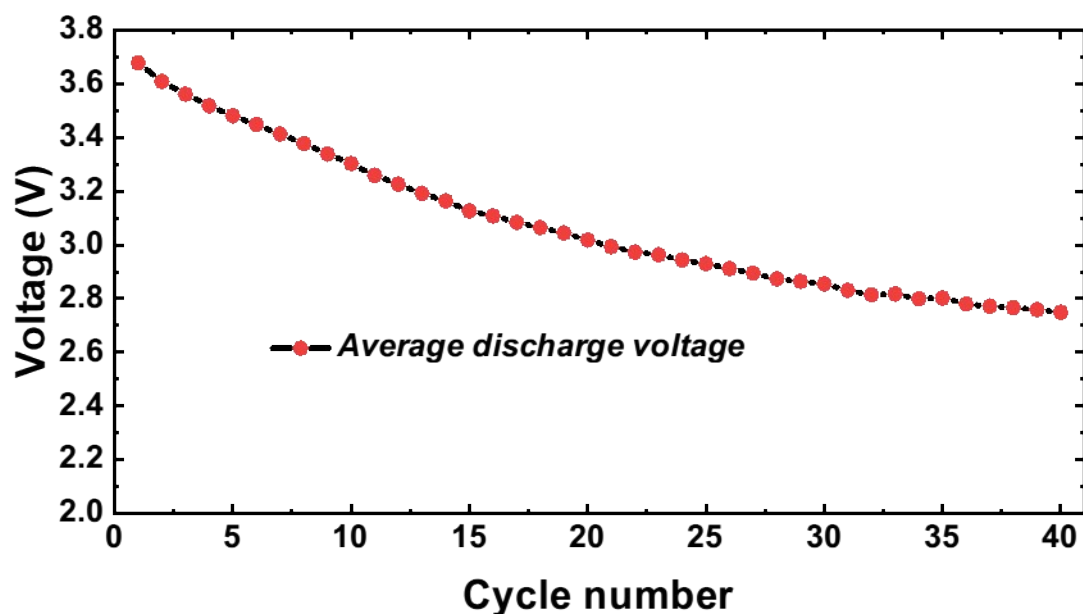

**Figure S17.** The evolution of average discharge voltage upon cycling for  $\text{Li}_{1.2}\text{Ni}_{0.13}\text{Co}_{0.13}\text{Mn}_{0.54}\text{O}_2$ -SPI-LAGP-SPI-Li cell at 0.1 C in the voltage range from 2 V to 4.6 V.

**Table S1** Comparison of the CCD value achieved in this work and other reported oxide-electrolytes based symmetrical cells.

| SSEs                                                                 | Interfacial modification | Interfacial resistance ( $\Omega \text{ cm}^2$ ) | CCD ( $\text{mA cm}^{-2}$ ) | Ref       |
|----------------------------------------------------------------------|--------------------------|--------------------------------------------------|-----------------------------|-----------|
| $\text{Li}_7\text{La}_3\text{Zr}_2\text{O}_{12}$                     | None                     | 5                                                | 0.6                         | 1         |
| $\text{Li}_{6.4}\text{La}_3\text{Zr}_{1.4}\text{Ta}_{0.6}\text{O}_1$ | $\text{SnO}_2$           | 25                                               | 1.15                        | 2         |
| $\text{Li}_{1.5}\text{Al}_{0.5}\text{Ge}_{1.5}(\text{PO}_4)_3$       | Bismuth layer            | 92.8                                             | 1.6                         | 3         |
| $\text{Li}_7\text{La}_3\text{Zr}_2\text{O}_{12}$                     | $\text{Cu}_3\text{N}$    | 83.4                                             | 1.5                         | 4         |
| $\text{Li}_{1.5}\text{Al}_{0.5}\text{Ge}_{1.5}(\text{PO}_4)_3$       | Ionic liquid             | 5                                                | >2                          | 5         |
| $\text{Li}_{1.5}\text{Al}_{0.5}\text{Ge}_{1.5}(\text{PO}_4)_3$       | SPI                      | 70                                               | 7                           | This work |

## References

- 1 A. Sharafi, C. G. Haslam, R. D. Kerns, J. Wolfenstine and J. Sakamoto, *J. Mater. Chem. A*, 2017, **5**, 21491–21504.
- 2 Y. Chen, M. He, N. Zhao, J. Fu, H. Huo, T. Zhang, Y. Li, F. Xu and X. Guo, *J. Power Sources*, 2019, **420**, 15–21.
- 3 F. Hu, Y. Li, Y. Wei, J. Yang, P. Hu, Z. Rao, X. Chen, L. Yuan and Z. Li, *ACS Appl. Mater. Interfaces*, 2020, **12**, 12793–12800.
- 4 H. Huo, Y. Chen, R. Li, N. Zhao, J. Luo, J. G. Pereira Da Silva, R. Mücke, P. Kaghazchi, X. Guo and X. Sun, *Energy Environ. Sci.*, 2020, **13**, 127–134.
- 5 S. Xiong, Y. Liu, P. Jankowski, Q. Liu, F. Nitze, K. Xie, J. Song and A. Matic, *Adv. Funct. Mater.*, DOI:10.1002/adfm.202001444.
